# Supplementary material for: H2S Enhanced the Tolerance of Malus hupehensis to Alkaline Salt Stress through the Expression of Genes Related to Sulfur-Containing Compounds and the Cell Wall in Roots
Source: MDPI journal article supplement (doi:10.3390/ijms232314848), 2022-11-27
Supplement: s1 [file s1]

## Supplementary material

# H<sub>2</sub>S Enhanced the Tolerance of *Malus hupehensis* to Alkaline Salt Stress through the Expression of Genes Related to Sulfur-Containing Compounds and the Cell Wall in Roots

Huan Li<sup>†</sup>, Weiwei Zhang<sup>\*†</sup>, Mengyuan Han, Jianfei Song, Yuansheng Ning and Hongqiang Yang<sup>\*</sup>

State Key Laboratory of Crop Biology, College of Horticulture Science and Engineering, Shandong Agricultural University, 61 Daizong Street, Tai'an 271018, China

\* Correspondence: zhangww@sdaa.edu.cn (W.Z.); hqyang@sdaa.edu.cn (H.Y.)

† These authors contributed equally to this work.

Table S1 Sequence of qRT-PCR primers for deferentially expressed genes

| Gene ID      | Gene description                                                | Forward primer          | Reverse Primer          |
|--------------|-----------------------------------------------------------------|-------------------------|-------------------------|
| LOC103438253 | low affinity sulfate transporter 3                              | AATCCAATCTTCTTCCTC      | ATTAGCATATCCAATACTCT    |
| LOC103423770 | uncharacterized LOC103423770                                    | AAGTCTAGTAGTAGTAGTAGT   | CTAAGGAATATCAGGATGG     |
| LOC103423808 | protein ALTERED XYLOGLUCAN 4-like                               | CAATATCATCACTCATCATC    | AGGAGAGGAAGAATAAGA      |
| LOC103443393 | hydroxyproline O-galactosyltransferase HPGT1-like               | GAACTTGATAGGATTACTG     | CGCTGATAACTTCTTATG      |
| LOC103454744 | probable phospholipid hydroperoxide glutathione peroxidase      | GATAAGGTGGATGTGAAT      | CTAAGAGGAGAAGTTGTAG     |
| LOC103454388 | thioredoxin reductase NTRB-like                                 | CTGAGCCTGATGAGAAGAAG    | GTGGAAGCGGAAGAAGAC      |
| LOC103449875 | hexokinase-1-like                                               | ATTATACGAGCATTACACTGAAT | CCAGAGCCATCATTAGAGT     |
| LOC103424166 | basic leucine zipper 9-like                                     | CGTCTCACCAACCATTAC      | ACAGTATCGCTCATCATCA     |
| LOC103435863 | galacturonosyltransferase 8                                     | TGTCCATATTGAACCACTTG    | AACCACTATATCGTCATCCA    |
| LOC103404371 | ferredoxin-thioredoxin reductase catalytic chain, chloroplastic | GGAGCCGTCAGATAAGTC      | CCTTGATAACAACAGAAGTAACT |

Table S2 Summary of clean reads and genes mapped to the reference genome and gene from H<sub>2</sub>S and alkaline salt stress roots of *M. hupehensis*

| Sample                | Total Clean<br>Reads genome | Total<br>Mapping(%)<br>genome | Uniquely<br>Mapping(%)<br>genome | Total Clean<br>Reads gene | Total<br>Mapping(%)<br>gene | Uniquely<br>Mapping(%)<br>gene |
|-----------------------|-----------------------------|-------------------------------|----------------------------------|---------------------------|-----------------------------|--------------------------------|
| Control-1             | 40.84 M                     | 72.86 %                       | 34.84 %                          | 40.84 M                   | 68.28 %                     | 29.21 %                        |
| Control-2             | 38.23 M                     | 72.97 %                       | 34.85 %                          | 38.23 M                   | 68.69 %                     | 29.13 %                        |
| Control-3             | 39.38 M                     | 73.21 %                       | 34.91 %                          | 39.38 M                   | 69.28 %                     | 29.19 %                        |
| H <sub>2</sub> S-1    | 42.2 M                      | 73.24 %                       | 35.1 %                           | 42.2 M                    | 68.87 %                     | 28.77 %                        |
| H <sub>2</sub> S-2    | 41.74 M                     | 73.8 %                        | 35.25 %                          | 41.74 M                   | 69.55 %                     | 29.04 %                        |
| H <sub>2</sub> S-3    | 41.85 M                     | 72.97 %                       | 34.82 %                          | 41.85 M                   | 68.22 %                     | 28.57 %                        |
| H <sub>2</sub> S+AS-1 | 41.82 M                     | 73.48 %                       | 34.12 %                          | 41.82 M                   | 68.27 %                     | 29.91 %                        |
| H <sub>2</sub> S+AS-2 | 42.71 M                     | 73.85 %                       | 34.44 %                          | 42.71 M                   | 68.89 %                     | 29.41 %                        |
| H <sub>2</sub> S+AS-3 | 43.78 M                     | 72.89 %                       | 34.21 %                          | 43.78 M                   | 67.67 %                     | 29.03 %                        |
| AS-1                  | 42.63 M                     | 72.23 %                       | 33.37 %                          | 42.63 M                   | 67.03 %                     | 28.8 %                         |
| AS-2                  | 42.12 M                     | 72.31 %                       | 33.89 %                          | 42.12 M                   | 66.94 %                     | 28.66 %                        |
| AS-3                  | 37.82 M                     | 72.85 %                       | 33.8 %                           | 37.82 M                   | 67.45 %                     | 29.49 %                        |

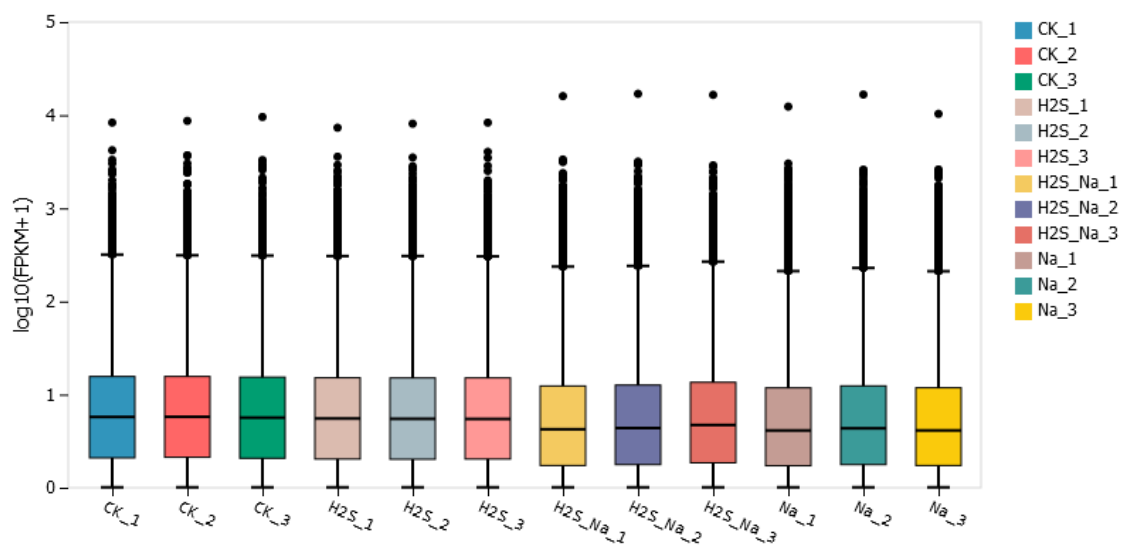

**Figure S1** The box plot shows the distribution of gene expression level of each sample, and the dispersion of data distribution can be observed.

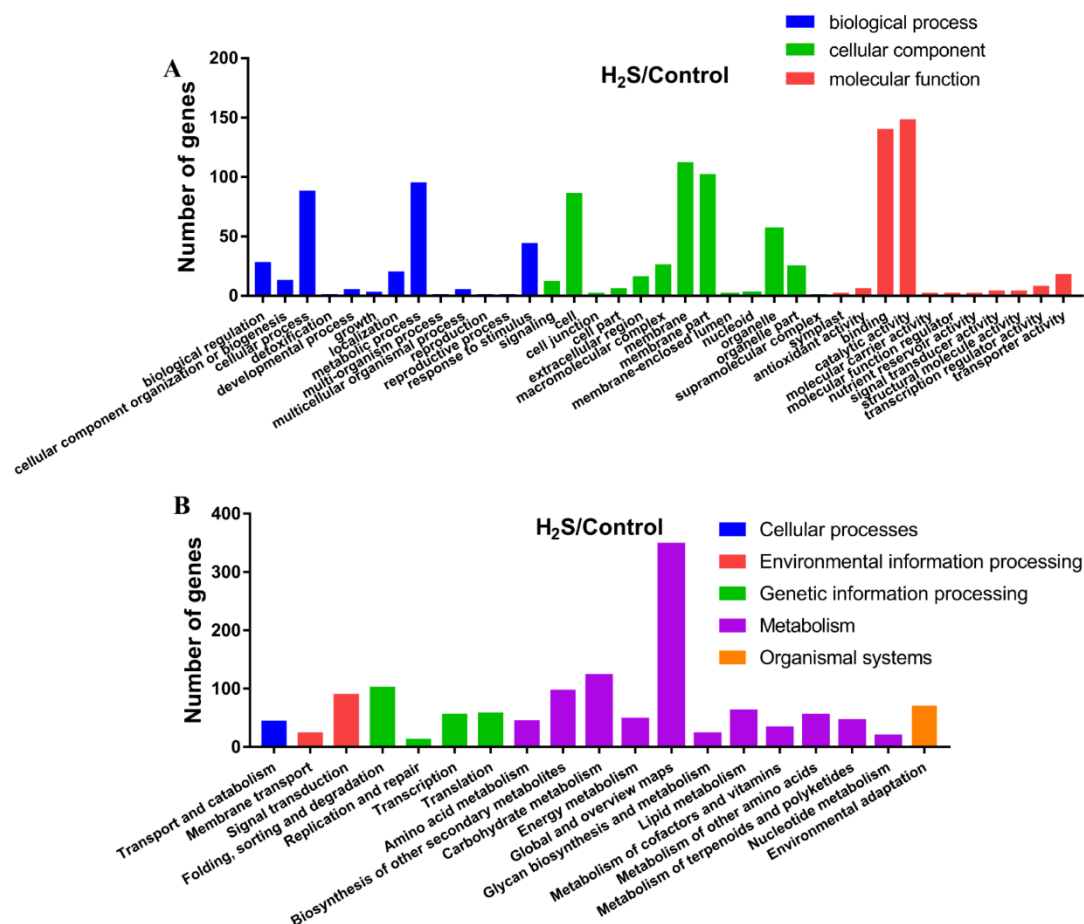

**Figure S2 Gene ontology and KEGG pathway classification of differentially expressed genes in H<sub>2</sub>S compared with control group.** GO classification of DEGs. Blue, green and red represent three GO ontologies: biological process, cellular component, molecular function and, respectively (A). KEGG pathway classification of DEGs. Blue, red, green, purple, and orange represent the different KEGG pathway: cellular processes, environmental information processes, genetic information processes, metabolism, and organism systems (B).

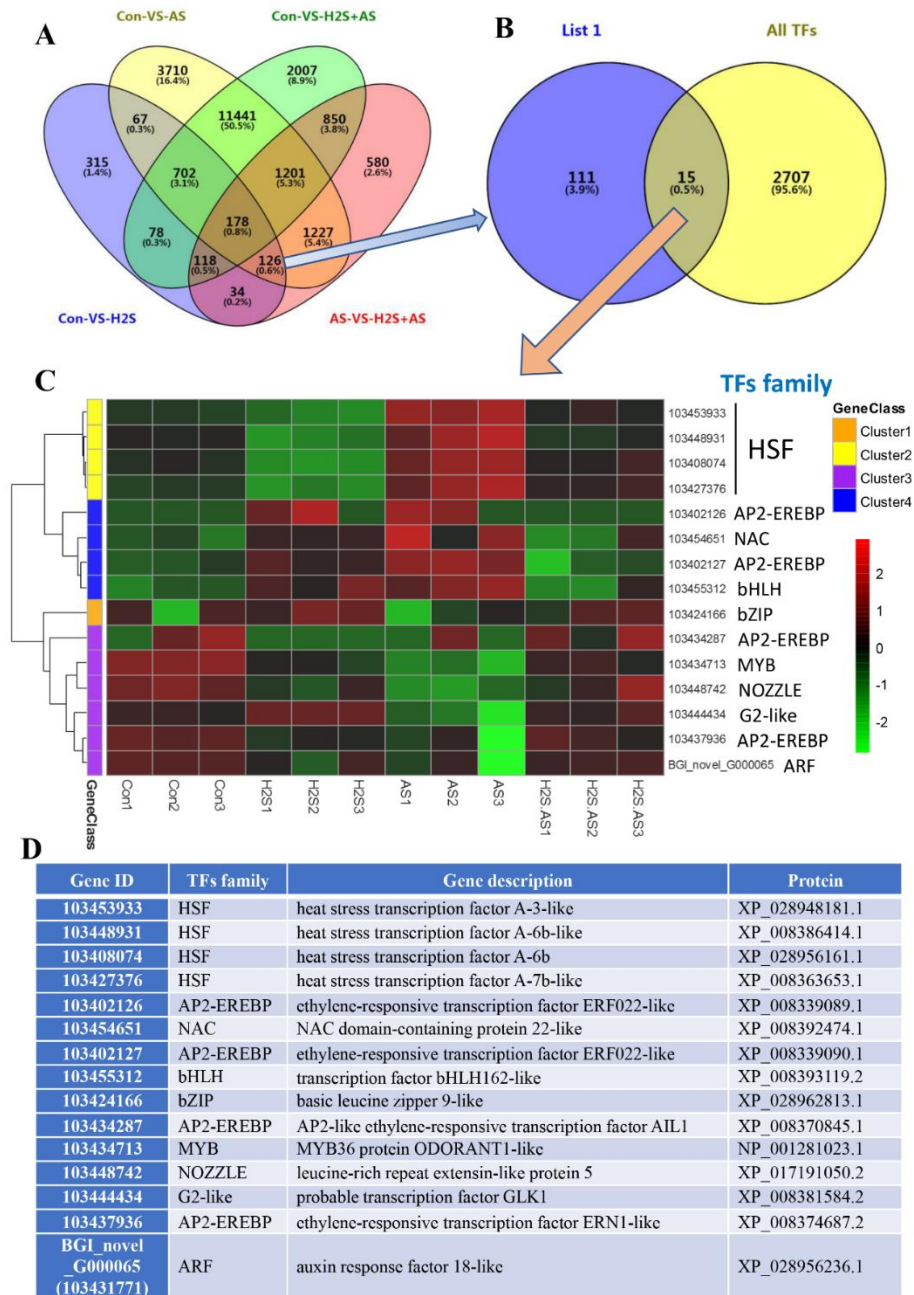

**Figure S3 HSF family transcription factors play an important role in the process of  $H_2S$  mediated alkaline salt stress relief.** Venn of the number of DEGs in different comparison groups (A). Identification of differentially expressed key transcription factors (B). The expression patterns of differentially expressed TFs were analyzed by heatmap (C). The information of key TFs may play an important role in the process of  $H_2S$  mediated alkaline salt stress relief (D).
